# Supplementary material for: Bimanual motor skill learning and robotic assistance for chronic hemiparetic stroke: a randomized controlled trial
Source: PubMed Central journal article supplement — Neural Regen Res. 2021 Jan 7;16(8):1566–73. doi: 10.4103/1673-5374.301030 (PMC8323667; doi:10.4103/1673-5374.301030), 2021-01-07
Supplement: NRR-16-1566_Suppl1.pdf [file NRR-16-1566_Suppl1.pdf]

**1) Intitulé de l'étude :**

Apprentissage moteur et rétention des compétences bimanuelles coopératives chez les sujets sains et les patients victimes d'un accident vasculaire cérébral (AVC) : exploration des substrats génétiques et neuronaux par neuro-imagerie fonctionnelle et modulation thérapeutique par stimulation cérébrale non-invasive.

**2) Médecins responsables de l'étude:**

Pr. Yves VANDERMEEREN & Pr. Patrice LALOUX  
Service de Neurologie, CHU Mont-Godinne UCL

**3) Médecin auprès de qui des informations complémentaires peuvent être obtenues :**

Pr Yves VANDERMEEREN Tél : 081/42.33.21 (secrétariat)  
Service de Neurologie, E-mail : [yves.vandermeeren@uclouvain.be](mailto:yves.vandermeeren@uclouvain.be)  
CHU Mont-Godinne UCL Avenue Dr Therasse 5530 Yvoir

**4) Buts de l'expérimentation :**

80% des patients qui survivent à un accident vasculaire cérébral (AVC ou « thrombose cérébrale » ou « infarctus cérébral ») souffrent d'une paralysie partielle ou complète qui réduit leur autonomie dans la vie quotidienne et les empêche d'accomplir des actions bimanuelles (avec les deux mains) comme boutonner une chemise, ouvrir un bocal, etc. Une meilleure connaissance des zones du cerveau impliquées dans l'apprentissage bimanuel chez les sujets volontaires sains et chez les patients victimes d'un AVC permettra de développer de nouvelles méthodes de neuro-revalidation. De plus, il est possible que les caractéristiques génétiques déterminent jusqu'à un certain point la capacité d'apprentissage et de récupération. Nous souhaitons également développer des biomarqueurs (imagerie cérébrale fonctionnelle et génétique) qui permettraient de prédire le succès de l'apprentissage bimanuel.

Une des approches les plus prometteuses pour renforcer la récupération motrice post-AVC est l'utilisation de stimulations non-invasives du cerveau comme la tDCS (transcranial direct current stimulation). La tDCS a démontré sa capacité à améliorer la réalisation de mouvements volontaires chez des patients après un AVC. Jusqu'à présent, les études ont surtout démontré un effet passager sur la fonction motrice (la capacité à faire des mouvements). Nous souhaitons vérifier s'il est possible d'amplifier l'apprentissage bimanuel et la récupération des mouvements. Cependant, comme les fonctions motrices peuvent migrer vers des aires cérébrales inhabituelles, le choix des meilleures zones à stimuler reste à établir, de même que l'effet sur l'apprentissage et la revalidation (kinésithérapie).

Les buts généraux de cette étude sont d'étudier (1) comment le cerveau apprend et retient les tâches bimanuelles, chez les sujets volontaires sains et chez les patients victimes d'un AVC, (2) s'il est possible de prédire l'apprentissage sur base génétique et avec l'imagerie cérébrale fonctionnelle, et (3) de comparer l'effet de la stimulation non-invasive par tDCS sur les différentes aires cérébrales impliquées dans la réalisation et l'apprentissage de mouvements atteints par l'AVC, afin de déterminer la meilleure aire-cible pour amplifier l'apprentissage des mouvements et la récupération des mouvements.

- Objectif 1 :** Développer de nouveaux test bimanuels notamment sur une interface robotique qui requièrent la coopération des mains, avec une pertinence pour la vie quotidienne.
- Objectif 2 :** Au moyen de l'IRM fonctionnelle (IRMf), déterminer les bases de l'apprentissage bimanuel et de sa mémoire chez les sujets volontaires sains.
- Objectif 3 :** Pour la 1ère fois, déterminer les bases de l'apprentissage bimanuel et de sa mémoire après AVC, au moyen de l'IRMf.
- Objectif 4 :** Tester l'hypothèse que le succès de l'apprentissage bimanuel peut être prédit sur base de l'imagerie cérébrale fonctionnelle par IRM (resting-state fMRI & Diffusion Tensor Imaging (DTI)).
- Objectif 5 :** Tester l'hypothèse que le succès de l'apprentissage bimanuel peut être prédit sur base de d'une analyse d'un gène (le gène BDNF).
- Objectif 6 :** Comparer l'effet de la tDCS (une méthode de stimulation cérébrale non-invasive) sur l'apprentissage et la récupération, et sur l'activité cérébrale (IRMf, TMS), lorsqu'elle est appliquée aux différentes aires-cibles révélées par fMRI et TMS.

## 5) Déroulement de l'expérimentation et description des interventions

Cette étude implique des visites supplémentaires, qui sont nécessaires pour établir des conclusions. Ces visites NE sont PAS à charge du patient. Si vous ne souhaitez pas ou ne pouvez revenir aux visites de contrôle, merci de bien vouloir nous en informer AVANT de participer à l'étude. Concrètement, après discussion et consentement, le patient sera évalué par fMRI lors d'une des premières visites (entre 1 à 10 visites, si l'examen est trop long ou si des problèmes techniques surviennent). Il sera évalué par TMS et fMRI lors d'1 à 9 visites ultérieures. Enfin, il sera stimulé par tDCS au cours d'2 à 12 visites (avec ou sans fMRI). Total : entre 3 et 21 visites, en fonction des résultats.

### a) IRMf : Imagerie par Résonance Magnétique fonctionnelle (1-2 heures; 5 - 10 séances):

Les IRM fonctionnelles seront réalisées par le service d'Imagerie Médicale du CHU UCL Mont-Godinne. L'IRM est une technique d'imagerie médicale couramment employée dans les hôpitaux. Aucune irradiation n'est utilisée. L'IRM repose sur l'utilisation de champs magnétiques. L'IRM est la technique qui donne les images les plus précises du cerveau. Elle est employée pour le diagnostic et le suivi de nombreuses maladies comme la sclérose en plaques, les thromboses, etc. Elle est également utilisée en recherche pour relier les structures cérébrales aux différentes fonctions (parole, vision, mouvement). Dans cette étude elle permettra de localiser précisément les zones du cerveau qui s'activent lors de l'apprentissage moteur.

En pratique, le sujet est couché sur la table de l'IRM et sa tête est maintenue en position fixe par un support en plastique doublé de mousse. Il est positionné dans l'anneau de la machine (qui reste ouverte) et l'acquisition débute. A certains moments, il faudra rester parfaitement immobile, à d'autres moments, le sujet devra réaliser certains mouvements qui lui seront expliqués avant d'entrer dans la machine.

On évite d'employer l'IRM (ou l'IRMf) chez les personnes :

- qui portent un pace-maker ou d'autres dispositifs implantés (prothèses, ...)
- qui portent des clips métalliques, du métal dans la tête (sauf les plombages) ou un drain cérébral réglable
- qui portent certaines prothèses valvulaires cardiaques
- qui ont travaillé les métaux (sauf si une radiographie du crâne démontre qu'il n'y a pas de métal dans la tête)
- qui sont enceintes (3 premiers mois) ou qui allaitent depuis peu de temps

Pour les femmes en âge d'avoir des enfants, un test de grossesse sera réalisé avant l'IRMf. Par ailleurs, des protections auditives seront appliquées au niveau des oreilles, pour protéger le sujet du bruit de la machine. Si les précautions sont respectées, aucun risque n'est associé à l'IRMf.

**b) Évaluation fonctionnelle (1-2 heures) :**

Des tests d'adresse (bi)manuelle, de mouvements des bras ou des jambes, de la sensibilité, des fonctions cognitives, des questionnaires sur l'utilisation des mains et des mesures précises de la force de la main seront réalisés. La vitesse et la force du bras et de la main lors de certains mouvements seront mesurées à l'aide de capteurs attachés au bras et à la main ou aux jambes par des bandes velcro.

Certaines séances impliqueront l'utilisation d'un robot de neurorevalidation qui permettra une mesure précise des mouvements du participant. Durant ces séances, les sujets devront manipuler un joystick afin de réaliser différentes tâches projetées sur un écran placé devant eux. Il n'y a aucun risque associé.

**c) Détermination du polymorphisme du gène du BDNF (brain-derived neurotrophic factor) :**

Des études récentes réalisées chez l'homme ont démontré que certains gènes (dont celui du BDNF) sont impliqués dans la récupération après lésion cérébrale et dans l'apprentissage, et qu'ils peuvent également influencer la réponse aux stimulations cérébrales comme la TMS ou la tDCS (çà que certaines personnes répondent « mieux » aux stimulations). Nous souhaitons déterminer le gène du BDNF afin de vérifier si cela prédit la réponse aux stimulations cérébrales ou les observations à l'IRMf.

En pratique, une simple prise de sang classique suffit. Les analyses seront réalisées de façon confidentielle. Cette analyse génétique n'a pas d'implication importante comme d'autres analyses génétiques, par exemple celles qui démontreraient la présence d'une maladie grave (prédisposition au cancer, maladie de Huntington, etc ...)

**d) par TMS (1-3 heures; de 1 à 4 séances en fonction des résultats) :**

Le système moteur sera étudié par TMS (Stimulation Magnétique Transcrânienne). Le sujet sera assis durant l'expérience. Des électrodes de surface d'ElectroMyoGraphie (EMG) seront appliquées sur les muscles de la main ou du bras, ainsi qu'un bonnet quadrillé sur son crâne. La TMS sera appliquée à la surface du scalp, suivant le grillage du bonnet. Des capteurs de mouvements seront disposés sur le bras et le tronc.

Le sujet devra réaliser différents mouvements, la TMS sera appliquée en début de mouvement ou juste avant le mouvement et entrainera une perturbation qui sera mesurée. Différentes aires-cibles mises en évidence par la fMRI seront visées. A la fin de l'expérience, un courant électrique de faible intensité sera appliqué au niveau du bras pour comparer la réponse après stimulation électrique et les réponses après TMS.

La TMS est une technique indolore qui permet d'activer les cellules nerveuses. Un champ magnétique est généré dans un anneau. Ce champ magnétique traverse de façon indolore l'os, la peau ou les autres tissus du corps. Ceci permet de stimuler les cellules du cerveau à travers le cuir chevelu et le crâne ou de stimuler les nerfs à travers la peau et les muscles.

On évite d'utiliser la TMS chez les personnes :

- qui font des crises d'épilepsie non contrôlées
- qui ont du métal dans la tête (sauf les plombages qui ne causent aucun problème)
- qui ont été opérées de la tête ou qui ont eu une fracture du crâne (à discuter)
- qui portent un stimulateur spinal ou vésical
- qui portent un appareil auditif en permanence

Exceptionnellement, il arrive que la TMS provoque une crise d'épilepsie, mais cela arrive chez des personnes prédisposées ou ayant déjà développé des crises épileptiques, avec des fréquences de stimulations qui ne sont pas employées dans notre laboratoire. Les effets ne sont jamais définitifs. Parfois, certaines personnes ressentent une fatigue qui disparaît rapidement, ont éventuellement mal à la tête, d'autres ont de petites difficultés de concentrations. Tous ces effets sont transitoires et disparaissent rapidement.

#### **6) Dispositions particulières et exclusion:**

Afin d'éviter des inconvénients potentiels liés aux expériences, il faudra exclure de l'expérimentation les sujets :

- qui portent des clips métalliques non IRM-compatibles, du métal dans la tête (sauf les plombages) ou un drain cérébral réglable
- qui portent un pacemaker ou souffrent d'un trouble du rythme cardiaque
- qui portent un stimulateur spinal ou vésical
- qui portent un appareil auditif en permanence ou d'autres dispositifs implantés (prothèses, ...) (pour la partie IRM uniquement)
- qui portent certaines prothèses valvulaires cardiaques (pour la partie IRM uniquement)

- qui ont travaillé les métaux (sauf si une radiographie du crâne exclut la présence de métal)
- qui sont enceintes (3 premiers mois) ou qui allaitent depuis peu de temps
- qui font des crises d'épilepsie non-contrôlées (pour la partie tDCS et TMS)
- qui ont été opérées de la tête, ont eu une fracture du crâne (pour la partie SMT et tDCS uniquement)

Il n'y a aucune préparation particulière pour aucun des tests (pas besoin d'être à jeun, etc...).

Par ailleurs, seront exclus de l'étude les patients :

- qui ont eu plusieurs AVC importants
- qui sont incapables de comprendre ou de réaliser les tests
- qui souffrent de problèmes de santé graves tels qu'insuffisance cardiaque ou rénale, diabète mal équilibré, etc....

Il n'y a aucune préparation particulière pour aucun des tests (pas besoin d'être à jeun, etc...).

**7) La participation ou la non-participation à cette recherche ne modifieront en rien l'attention médicale et la qualité des soins qui seront prodigués aux patients.**

**8) Le secret médical et les exigences légales en matière de vie privée (tel que l'anonymat) seront strictement observés.**

**9) Tout sujet est libre d'interrompre sa participation à la recherche au moment où il/elle le juge nécessaire ou souhaitable.**

**10) Les risques liés à l'expérimentation seront couverts par une assurance**

**11) Le projet de recherche a été approuvé par la COMMISSION D'ETHIQUE MEDICALE du CHU UCL Namur, Faculté de Médecine de l'UCL.**

**12) L'accord du comité d'éthique est légal mais n'est pas une garantie de l'innocuité de l'expérimentation, ni sur son bon déroulement.**

Je soussigné(e), \_\_\_\_\_

Né(e) le \_\_\_\_\_ reconnait avoir été pleinement informé sur la recherche à laquelle je participe, ainsi que sur les risques potentiels qui en découlent.

J'ai été pleinement informé de mes droits et sur les conditions dans lesquelles cette recherche se déroulera. J'ai eu la possibilité de poser toute question.

J'accepte que toutes les données et images recueillies au cours de cette recherche soient utilisées pour des publications scientifiques. L'anonymat et le secret médical seront strictement préservés. La participation ou la non-participation à cette recherche ne modifieront en rien l'attention médicale et la qualité des soins qui seront prodigués au patient

Fait à \_\_\_\_\_, le \_\_\_\_\_

**Signature**
