# Supplementary material for: Bimanual motor skill learning and robotic assistance for chronic hemiparetic stroke: a randomized controlled trial
Source: PubMed Central journal article supplement — Neural Regen Res. 2021 Jan 7;16(8):1566–73. doi: 10.4103/1673-5374.301030 (PMC8323667; doi:10.4103/1673-5374.301030), 2021-01-07
Supplement: NRR-16-1566_Suppl2.pdf [file NRR-16-1566_Suppl2.pdf]

**SITE GODINNE**

Yvoir, le jeudi 14 juillet 2016

**COMITE D'ETHIQUE  
MEDICALE**

**Président**  
Pr P. Evrard

**Secrétaire**  
P. G. Lawson

Tél. Sec: 081 42 33 28  
Fax : 081 42 38 62

comite.ethique-  
montgodinne@uclouvain.be

**ACCORD FINAL – AMENDEMENT N°5**

Agence Fédérale des Médicaments et des Produits de Santé, Division R&D, Eurostation bloc 2, Place Victor Horta 40, boîte 40, 1060 BRUXELLES

Investigateur principal: Prof. Yves VANDERMEEREN - Neurologie

Comité d'éthique local:

- Comité d'éthique Hospitalo-Facultaire Saint-Luc – UCL, Avenue Hippocrate 55.14, Tour Harvey, niveau 0, 1200 Bruxelles

**Concerne:**

- **N° interne CE Mont-Godinne: 54/2010**
- **NUB: B039201317382**
- **Intitulé:** Apprentissage procédural après accident vasculaire cérébral (AVC): des substrats neuronaux et génétiques à la modulation thérapeutique par stimulation cérébrale non-invasive» [Post-stroke procedural learning: from neural and genetic substrates to therapeutic modulation by non-invasive brain stimulation
- **Investigateur responsable: Prof. Yves Vandermeeren- Neurologie**

Cher Confrère,

Le Comité d'éthique a bien pris connaissance, dans votre courrier daté du 29 mai 2016, de **l'amendement n°5** dans le cadre de l'étude susmentionnée.

Le Comité d'éthique du C.H.U. UCL Namur, site Godinne marque son accord pour l'introduction d'une nouvelle mesure motrice: l'utilisation d'un robot de neuro-revalidation permettant un apprentissage bimanuel ainsi que des mesures motrices beaucoup plus précises.

**La commission marque son accord pour la poursuite de l'étude dans notre établissement et rappelle que l'étude relève entièrement de la responsabilité de l'investigateur.**

Nous vous prions d'agréer, Cher Collègue, l'expression de nos meilleurs sentiments.

Professeur G. LAWSON  
Secrétaire

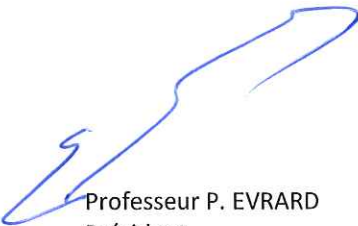

Professeur P. EVRARD  
Président

**CHU Dinant Godinne | UCL Namur**
