# Supplementary material for: Bimanual motor skill learning and robotic assistance for chronic hemiparetic stroke: a randomized controlled trial
Source: PubMed Central journal article supplement — Neural Regen Res. 2021 Jan 7;16(8):1566–73. doi: 10.4103/1673-5374.301030 (PMC8323667; doi:10.4103/1673-5374.301030), 2021-01-07
Supplement: NRR-16-1566_Suppl3.pdf [file NRR-16-1566_Suppl3.pdf]

### **Additional file 3**

#### **Stroke subjects screening**

For the stroke subjects, the inclusion criteria were 1) having a chronic stroke (> 6 months), 2) being between 18-90 years old, 3) showing a lesion on brain imaging, and 4) demonstrating a motor deficit in the UL. The exclusion criteria were 1) problems in understanding or executing commands of the task, 2) alcohol or drug addiction. For HI, the inclusion criteria were 1) being right-handed and 2) being between 18-90 years old. Exclusion criteria were 1) having a history of neurological problems, 2) alcohol or drug addiction.

Because we wanted to include a broad range of deficits, there was no cut-off threshold for motor deficit: even stroke subjects with slight deficits were a priori eligible. The Stroke database of the CHU UCL Namur (Mont-Godinne) was used for screening stroke subjects corresponding to the inclusion and exclusion criteria, and then the file records were checked.
